# Supplementary material for: Theoretical study on conformational preferences of ribose in 2-thiouridine—the role of the 2′OH group
Source: Royal Society of Chemistry journal article supplement (doi:10.1039/b921646d), 2010-01-01
Supplement: b921646d.pdf [file b921646d.pdf]

## SUPPLEMENTARY MATERIAL

### Theoretical Study on Conformational Preferences of Ribose in 2-Thiouridine – the Role of the 2'OH Group

Ru bo Zhang<sup>1,2</sup> and Leif A. Eriksson<sup>2,3,\*</sup>

<sup>1</sup> *Institute for Chemical Physics, School of Science, Beijing Institute of Technology, Beijing 100081, China*

<sup>2</sup> *Department of Natural Sciences and Örebro Life Science Center, Örebro University, 701 82 Örebro, Sweden*

<sup>3</sup> *School of Chemistry, National University of Ireland - Galway, Ireland*

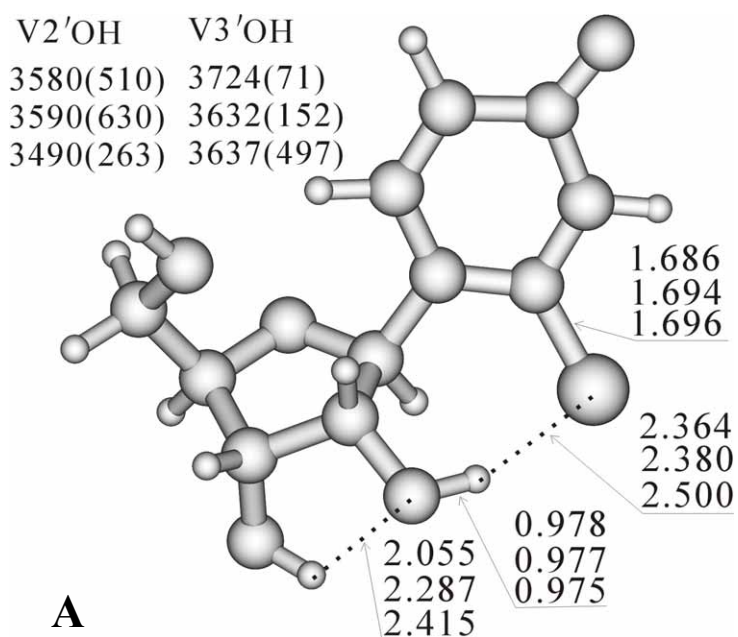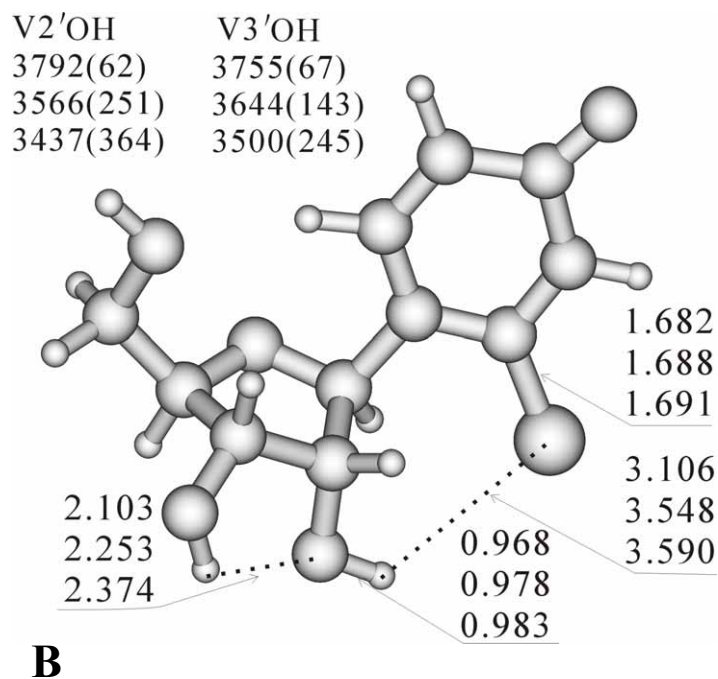

Figure S1. Optimized conformers a (A) and b (B), with key geometric parameters and vibrational frequencies in gas phase (top), non-polar medium (middle) and polar medium (bottom).
